# Supplementary material
Source: MDPI journal article supplement (https://www.mdpi.com/2076-0760/10/2/74)
Supplement: s1 [file s1]

# **Hierarchical cluster analysis of human value priorities and associations with subjective well-being, subjective general health, social life, and depression across Europe**

## **Supplementary Information**

The following tables contain relevant findings that were too extensive to include in the manuscript. Table S1 presents the Round 7<sup>th</sup> of European Social Survey (ESS) sample characterization in terms of residence country, gender, age, highest level of education achieved (International Standard Classification of Education, ISCED), years of full-time education completed, household's total net income and legal marital status, after data cleaning. Table S2 presents the statistical analysis results of the Subjective Well-being (SWB), Social-Life and Depression composite indices (Kolmogorov-Smirnov and Levene's tests), as well as the results of their comparison to Subjective General Health (SGH) (Kruskal–Wallis and Dunn's tests). Finally, Table S3 presents the Spearman correlations matrix between the ten basic human values' priorities and the indices found in each cluster for subjective well-being, SGH, social life and depression.

Table S1. Sample characterization: Count (*N*); row percentage per category (%) or mean (*M*) and standard deviation (*StD*).

| Variables                                             | <i>N</i> | % or <i>M</i> ( <i>StD</i> ) |
|-------------------------------------------------------|----------|------------------------------|
| Country                                               | 35,936   |                              |
| Austria                                               | 1,780    | 4.95                         |
| Belgium                                               | 1,720    | 4.79                         |
| Switzerland                                           | 1,489    | 4.14                         |
| Czech Republic                                        | 1,788    | 4.98                         |
| Germany                                               | 2,982    | 8.30                         |
| Denmark                                               | 1,475    | 4.10                         |
| Estonia                                               | 1,982    | 5.52                         |
| Spain                                                 | 1,857    | 5.17                         |
| Finland                                               | 2,044    | 5.69                         |
| France                                                | 1,885    | 5.25                         |
| United Kingdom                                        | 2,176    | 6.06                         |
| Hungary                                               | 1,460    | 4.06                         |
| Ireland                                               | 2,288    | 6.37                         |
| Lithuania                                             | 2,173    | 6.05                         |
| Netherlands                                           | 1,802    | 5.01                         |
| Norway                                                | 1,408    | 3.92                         |
| Poland                                                | 1,550    | 4.31                         |
| Portugal                                              | 1,209    | 3.36                         |
| Sweden                                                | 1,755    | 4.88                         |
| Slovenia                                              | 1,113    | 3.10                         |
| Gender                                                | 35,936   |                              |
| Male                                                  | 16,821   | 46.81                        |
| Female                                                | 19,115   | 53.19                        |
| Age (years) <sup>(a)</sup>                            | 35,880   | 49.27 (18.61)                |
| < 25                                                  | 4,140    | 11.50                        |
| 25-34                                                 | 4,938    | 13.70                        |
| 35-49                                                 | 8,811    | 24.50                        |
| 50-64                                                 | 9,329    | 26.00                        |
| 65-74                                                 | 5,267    | 14.70                        |
| > 74                                                  | 3,395    | 9.40                         |
| ES-ISCED highest level of education                   | 35,842   |                              |
| I - less than lower secondary                         | 3,569    | 9.93                         |
| II - lower secondary                                  | 6,254    | 17.40                        |
| IIIb - lower tier upper secondary                     | 6,419    | 17.86                        |
| IIIa - upper tier upper secondary                     | 6,273    | 17.46                        |
| IV - advanced vocational, sub-degree                  | 5,073    | 14.12                        |
| V1 - lower tertiary education, BA level               | 3,824    | 10.64                        |
| V2 - higher tertiary education, >= MA level           | 4,327    | 12.04                        |
| Other                                                 | 103      | 0.29                         |
| Years of full-time education completed <sup>(a)</sup> | 35,660   | 12.95 (3.96)                 |

| Variables                                          | N      | % or M (StD) |
|----------------------------------------------------|--------|--------------|
| Household's total net income, all sources (decile) | 28,858 |              |
| 1 <sup>st</sup>                                    | 2,737  | 7.62         |
| 2 <sup>nd</sup>                                    | 3,066  | 8.53         |
| 3 <sup>rd</sup>                                    | 3,021  | 8.41         |
| 4 <sup>th</sup>                                    | 3,132  | 8.72         |
| 5 <sup>th</sup>                                    | 3,083  | 8.58         |
| 6 <sup>th</sup>                                    | 3,030  | 8.43         |
| 7 <sup>th</sup>                                    | 2,983  | 8.30         |
| 8 <sup>th</sup>                                    | 2,884  | 8.03         |
| 9 <sup>th</sup>                                    | 2,388  | 6.65         |
| 10 <sup>th</sup>                                   | 2,534  | 7.05         |
| Legal marital status                               | 35,627 |              |
| Legally married                                    | 17,479 | 48.64        |
| In a legally registered civil union                | 330    | 0.92         |
| Legally separated                                  | 221    | 0.61         |
| Legally divorced/civil union dissolved             | 3,690  | 10.27        |
| Widowed/civil partner died                         | 3,117  | 8.67         |
| Never married or in legally registered civil union | 10,790 | 30.03        |

<sup>(a)</sup> for "Age" and "Years of full-time education completed", the mean and standard deviation were calculated.

Table S2. Kolmogorov-Smirnov, Levene and Kruskal-Wallis tests results (test statistics  $D$ ,  $W$  and  $X^2$ , respectively) for Subjective General Health (SGH) and the composite indices' distributions between clusters. Dunn's pairwise tests results indicate the cluster's ranking for significant median differences found and the corresponding effect sizes ( $\eta^2$ ). All associated  $p$ -values were  $< .001$  and, thus, are not indicated.

| Indices                         | Kolmogorov-Smirnov: $D$ |                     |                            |                          | Levene<br>$W$ | Kruskal-Wallis<br>$X^2$ | Dunn    | $\eta^2$ <sup>(a)</sup> |
|---------------------------------|-------------------------|---------------------|----------------------------|--------------------------|---------------|-------------------------|---------|-------------------------|
|                                 | Cluster 1<br>Social     | Cluster 2<br>Growth | Cluster 3<br>Strong Social | Cluster 4<br>Weak Growth |               |                         |         |                         |
| Subjective well-being (SWB)     | .12                     | 0.15                | .13                        | .12                      | 79.77         | 287.90                  | 1<3<4<2 | .01                     |
| Subjective general health (SGH) | .26                     | .26                 | .23                        | .26                      | 215.23        | 1,098.17                | 3<1<2<4 | .04                     |
| Social life                     | .06                     | .07                 | .07                        | .07                      | 42.18         | 1,611.69                | 1<3<4<2 | .05                     |
| Depression                      | .10                     | .10                 | .10                        | .10                      | 107.42        | 214.57                  | 2,4<1<3 | .01                     |

<sup>a)</sup> Effect size:  $\eta^2 < .01$  – no effect;  $.01 \leq \eta^2 < .06$  – small;  $.06 \leq \eta^2 < .11$  – intermediate;  $\eta^2 \geq .14$  – large (Cohen, 1988).

**Table S3.** Spearman correlations between human values' priorities and the indicators of subjective well-being (SWB), subjective general health (SGH), social life and depression, for the 4 clusters

| Index       | Cluster           | Openness to change |          |          | Self-Enhancement |          | Conservation |          |          | Self-Transcendence |          |
|-------------|-------------------|--------------------|----------|----------|------------------|----------|--------------|----------|----------|--------------------|----------|
|             |                   | SD                 | ST       | HE       | AC               | PO       | SE           | TR       | CO       | BE                 | UN       |
| SWB         | 1 - Social        | .016               | .017     | .078***  | .019             | -.073*** | -.063***     | -.015    | -.024*   | .056***            | -.033**  |
|             | 2 - Growth        | .023*              | .006     | .100***  | -.030**          | -.062*** | -.024*       | .003     | -.027*   | .057***            | -.016    |
|             | 3 - Strong Social | .073***            | .079***  | .067***  | -.016            | -.090*** | -.090***     | -.053*** | -.023    | .031*              | -.006    |
|             | 4 - Weak Growth   | .024*              | .049***  | .064***  | .021             | -.068*** | -.022        | -.061*** | -.009    | .086***            | -.045*** |
| SGH         | 1 - Social        | -.005              | .117***  | .073***  | .057***          | -.039*** | -.126***     | -.085*** | -.030**  | -.012              | -.020    |
|             | 2 - Growth        | -.038***           | .133***  | .006     | .060***          | .009     | -.061***     | -.040*** | -.019    | -.016              | -.020    |
|             | 3 - Strong Social | .045***            | .135***  | .140***  | .027*            | -.088*** | -.154***     | -.129*** | -.092*** | .029*              | .012     |
|             | 4 - Weak Growth   | -.039**            | .110***  | .050**   | .052**           | .010     | -.024*       | -.049*** | -.047*** | -.031*             | -.036**  |
| Social life | 1 - Social        | .000               | .076***  | .164***  | -.010            | -.096*** | -.091***     | -.057*** | -.085*** | .071***            | -.035*** |
|             | 2 - Growth        | .021               | .149***  | .136***  | -.018            | -.036**  | -.132***     | -.040*** | -.064*** | .064***            | .001     |
|             | 3 - Strong Social | .015               | .101***  | .191***  | -.033*           | -.147*** | -.140***     | -.054*** | -.080*** | .093***            | -.038**  |
|             | 4 - Weak Growth   | .015               | .132***  | .172***  | .034**           | -.099*** | -.101***     | -.094*** | -.153**  | .101***            | .026*    |
| Depression  | 1 - Social        | -.034**            | -.052*** | -.041*** | .007             | .027*    | .090***      | .018     | -.017    | .026*              | .030**   |
|             | 2 - Growth        | .009               | -.010    | -.074*** | .061***          | -.011    | .009         | -.016    | -.052*** | .048***            | .041***  |
|             | 3 - Strong Social | -.049***           | -.113*** | -.159*** | -.006            | .080***  | .172***      | .109***  | .036**   | .027*              | .036**   |
|             | 4 - Weak Growth   | .027*              | -.029*   | -.037**  | .013             | .014     | .001         | .014     | -.044*** | .032**             | .039**   |

Notes: \* Significant at  $p < .05$  level, \*\* Significant at  $p < .01$  level, \*\*\* Significant at  $p < .001$  level (two-tailed). (SD - self-direction; ST - stimulation; HE - hedonism; AC - achievement; PO - power; SE - security; TR - tradition; CO - conformity; BE - benevolence; UN - universalism)
